# Supplementary material for: A rationally-designed synergetic polypyrrole/graphene bilayer actuator
Source: Royal Society of Chemistry journal article supplement (doi:10.1039/c2jm15266e), 2012-01-01
Supplement: c2jm15266e.pdf [file c2jm15266e.pdf]

Electronic Supplementary Information

## A rationally-designed synergetic polypyrrole/graphene bilayer actuator

Jia Liu, Zhi Wang, Xuejun Xie, Huhu Cheng, Yang Zhao, and Liangti Qu

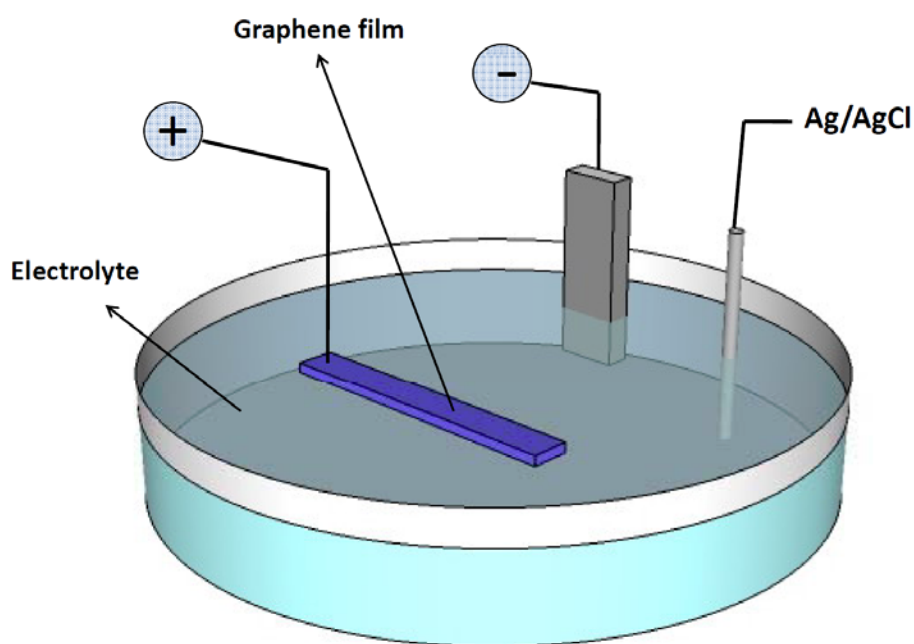

**Fig. S1** Experimental setup to produce a bilayer structure of PPy(ClO<sub>4</sub><sup>-</sup>) and graphene film by a floating polymerization method.
